# Supplementary material
Source: Springer Nature journal article supplement (https://www.springermedizin.de/resource/supplementary/13005_2010_186_MOESM1_ESM.pdf/9626444)

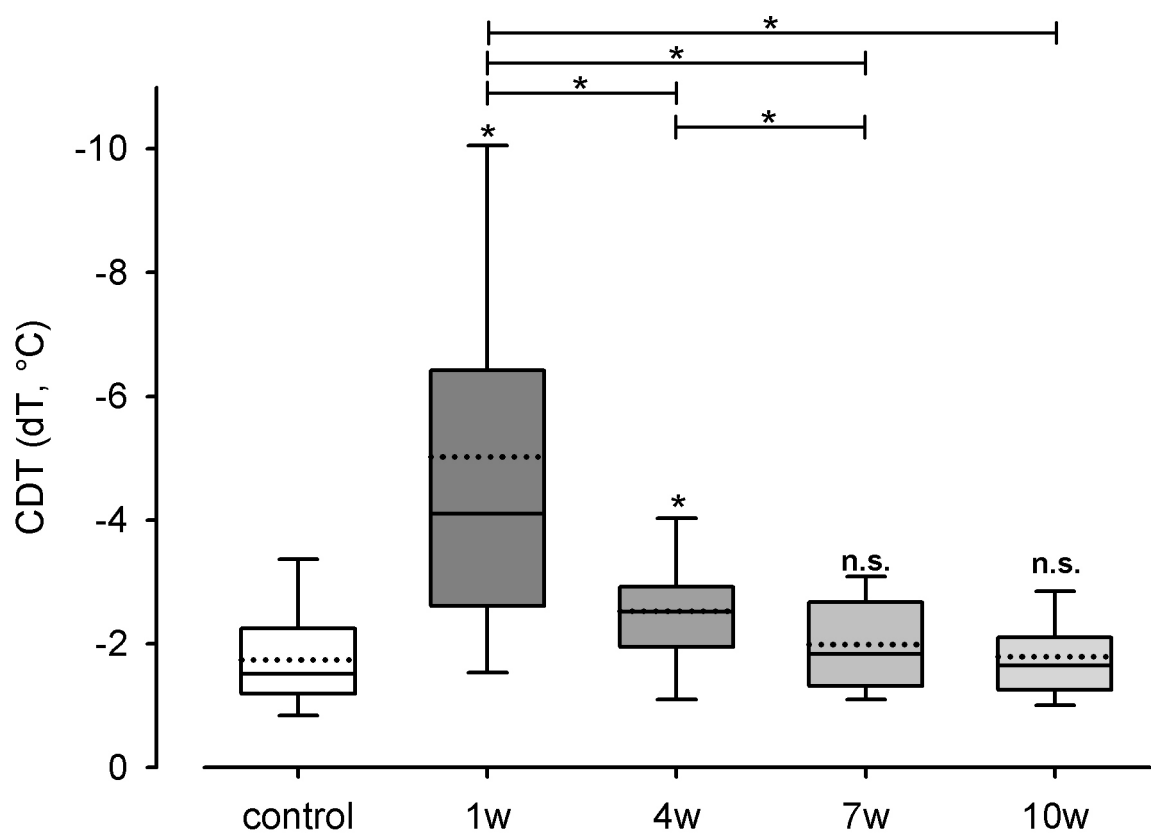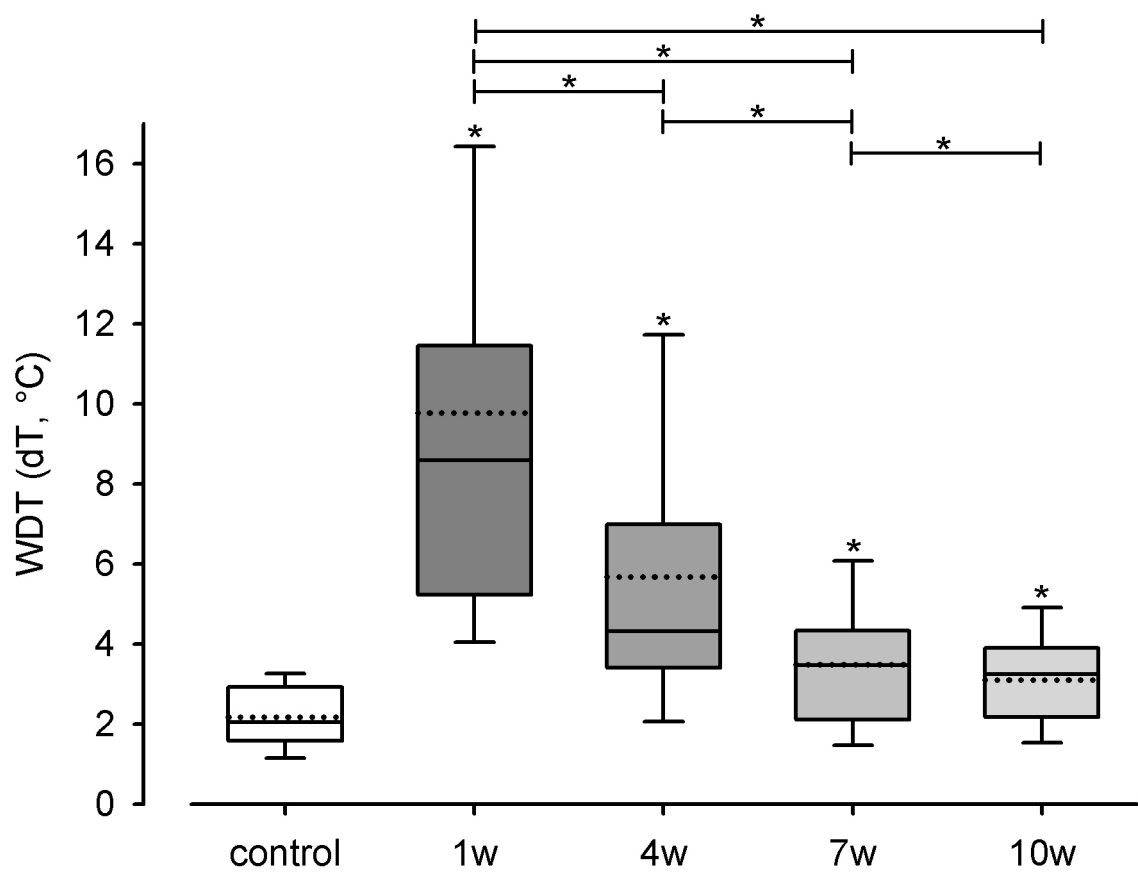

Supplement: MOESM1 [file 9626444]
